# Supplementary material
Source: Springer Nature journal article supplement (https://www.springermedizin.de/resource/supplementary/12978_2012_204_MOESM2_ESM.pdf/9602236)

**Percentage of MWRA using modern  
contraception**

35%  
30%  
25%  
20%  
15%  
10%  
5%  
0%

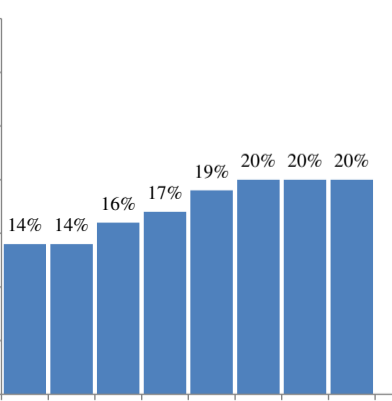

**Hard-to-reach**

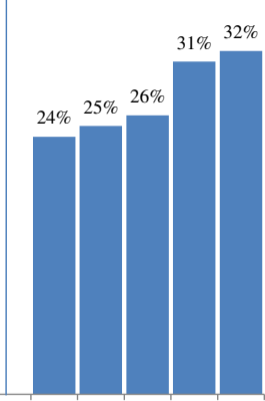

**Non-hard-to-reach**

Supplement: MOESM2 [file 9602236]
